# Supplementary material for: Leptospira Lipid A Is a Potent Adjuvant That Induces Sterilizing Immunity against Leptospirosis
Source: MDPI journal article supplement (doi:10.3390/vaccines11121824), 2023-12-06
Supplement: s1 [file s1]

## Supplementary data

***Leptospira* Lipid A is a potent adjuvant that induces sterilizing immunity against Leptospirosis.**

Vivek Varma et. al.

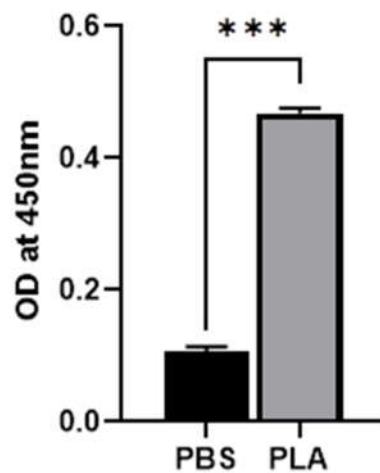

**Figure S1. Generation of anti-PLA antibodies in hamsters immunized with LAV-Alum-PLA.** PLA-specific total IgG antibody levels in the serum (1:10,000 dilution) of the immunized animals collected on the 35<sup>th</sup> day were measured by ELISA. The symbol \*\*\* represent p-value  $\leq 0.001$ .

## Supplementary tables

**Table. S1: The survival data of immunized animals following infection with a virulent strain of *Leptospira* for 28 days**

| Group         | Survival     |              |              |              |
|---------------|--------------|--------------|--------------|--------------|
|               | Experiment 1 | Experiment 2 | Experiment 3 | Experiment 4 |
| PBS           | 0/6          | 0/6          | 0/6          | 0/6          |
| LAV-Alum      | 2/6          | 4/6          | 3/6          | 3/6          |
| LAV-MPLA-Alum | 4/6          | 3/6          | 4/6          | 4/6          |
| LAV-PLA-Alum  | 4/4          | 5/6          | 6/6          | 6/6          |
| HKL           | 6/6          | 6/6          | 5/6          | 6/6          |

**Table. S2: Histopathological scores of different organs in hamsters following infection with virulent *Leptospira***

| Group         | Pathology score |             |             |              |             |             |              |             |             |              |             |             |
|---------------|-----------------|-------------|-------------|--------------|-------------|-------------|--------------|-------------|-------------|--------------|-------------|-------------|
|               | Experiment 1    |             |             | Experiment 2 |             |             | Experiment 3 |             |             | Experiment 4 |             |             |
|               | Liver           | Lung        | Kidney      | Liver        | Lung        | Kidney      | Liver        | Lung        | Kidney      | Liver        | Lung        | Kidney      |
| PBS           | 3,2,2,3,1,2     | 3,2,2,3,1,2 | 3,3,2,3,3,3 | 3,2,3,3,2,3  | 3,2,2,3,3,2 | 3,3,1,2,3,2 | 1,3,3,2,2,3  | 3,3,2,3,2,3 | 3,2,3,2,2,3 | 3,3,2,3,2,2  | 3,3,2,2,2,3 | 3,2,3,3,2,3 |
| LAV-Alum      | 2,1,3,1,2,1     | 2,1,3,1,2,1 | 2,2,3,2,3,2 | 1,2,3,2,2,3  | 1,2,2,3,1,2 | 1,1,2,2,3,1 | 2,1,3,2,2,2  | 2,2,3,3,2,1 | 3,2,2,1,2,3 | 3,1,2,3,2,2  | 3,1,2,1,2,3 | 1,2,3,1,2,2 |
| LAV-MPLA-Alum | 1,0,1,0,2,0     | 1,0,1,0,2,0 | 0,1,0,2,2,1 | 1,1,0,1,2,1  | 1,1,0,0,2,1 | 1,2,1,1,2,1 | 2,1,1,1,2,2  | 2,1,1,2,2,1 | 1,1,2,1,2,2 | 1,2,2,1,2,1  | 2,1,1,1,2,2 | 1,1,2,2,2,1 |
| LAV-PLA-Alum  | 1,0,1,0         | 0,0,1,0     | 0,1,1,0     | 1,0,0,1,1,2  | 0,1,0,0,0,1 | 0,1,0,1,0,0 | 0,1,0,1,0,0  | 0,1,1,0,0,0 | 0,0,0,1,0,0 | 0,1,1,0,0,0  | 0,1,0,1,1,0 | 0,1,1,0,0,0 |
| HKL           | 0,0,0,0,1,0     | 0,0,0,0,1,0 | 0,1,0,0,0,1 | 0,0,1,0,1,0  | 0,0,1,1,0,0 | 1,0,0,0,0,0 | 0,1,0,0,1,0  | 0,0,0,1,0,0 | 0,1,1,0,0,1 | 0,1,1,0,0,0  | 1,0,0,0,1,0 | 0,1,0,1,0,0 |

**Scores-**

- 3 - Severe lesions
- 2 - Moderate lesions
- 1 - Mild lesions
- 0 - Normal

**Table. S3: Primers used for qRT-PCR analysis in the study**

| <b>Gene name</b>  | <b>Primer</b> | <b>Sequence (5'→3')</b>    |
|-------------------|---------------|----------------------------|
| <i>Beta-actin</i> | F             | CACCCACACTGTGCCCATCTACGA   |
|                   | R             | GGATGCCACAGGATTCCATACCCA   |
| ccl2              | F             | ACGTGTTGGCTCAGCCAGA        |
|                   | R             | ACTACAGCTTCCTTTGGGACACC    |
| ccl3              | F             | ACTGCCTGCTGCTTCTCCTACA     |
|                   | R             | AGGAAAATGACACCTGGCTGG      |
| ccl5              | F             | AGATCTCTGCAGCTGCCCTCA      |
|                   | R             | GGAGCACTTGCTGCTGGTGTAG     |
| ccl8              | F             | CTTTGCCTGCTGCTCATAG        |
|                   | R             | GCACTGGATATTGTTGATTCTC     |
| ccl10             | F             | TACTGCTGGCTCACCTC          |
|                   | R             | ATCTGTCTTGTGAAACCC         |
| ccl12             | F             | GCTACCACCATCAGTCCTC        |
|                   | R             | CTGGCTGCTTGTGATTCTC        |
| ccr5              | F             | ACACTCAGTATCATTTCTGG       |
|                   | R             | GGATCAGGCTCAAGATGACC       |
| //6               | F             | TGGAGTCACAGAAGGAGTGGCTAAG  |
|                   | R             | TCTGACCACAGTGAGGAATGTCCAC  |
| tnf-a             | F             | ATAGCTCCCAGAAAAGCAAGC      |
|                   | R             | CACCCCGAAGTTCAGTAGACA      |
| ifn-g             | F             | ACTCAAGTGGCATAGATGTGGAAG   |
|                   | R             | GACGCTTATGTTGTTGCTGATGG    |
| il-17             | F             | TCCAGAAGGCCCTCAGACTA       |
|                   | R             | AGCATCTTCTCGACCCTGAA       |
| il-1b             | F             | GCCTTGGGCCTCAAAGGAAAAGAATC |
|                   | R             | GGAAGACACAGATTCCATGGTGAAG  |
| <i>Mip1a</i>      | F             | CCCAGCCAGGTGTCATTTTCC      |
|                   | R             | GCATTCAGTTCCAGGTCAGTG      |
| cxcl10            | F             | CATGGTCCTGAGACAAAAGT       |
|                   | R             | TGATGACACAAGTTCTTCCA       |
| il10              | F             | GCCAGAGCCACATGCTCCTA       |
|                   | R             | GATAAGGCTTGGCAACCCAAGTAA   |
| il5               | F             | TGAGGCTTCCTGTCCCTACTCATAA  |
|                   | R             | TTGGAATAGCATTTCACAGTACCC   |
| cox2              | F             | TCTGGAACATTGTGAACAACATC    |
|                   | R             | AAGCTCCTTATTTCCCTTCACAC    |
| tlr2              | F             | CTCCTGAAGCTGTTGCGTTAC      |
|                   | R             | GCTCCCTTACAGGCTGAGTTC      |
| tlr4              | F             | TCGCCTTCTTAGCAGAAACAC      |
|                   | R             | GCCTTAGCCTCTTCTCCTTC       |
| foxp3             | F             | GAGAGGCAGAGGACACTCAATG     |
|                   | R             | GCTCAGGTTGTGGCGGATG        |
| 16s rRNA          | F             | TAAAGGCTCACCAAGGCGAC       |
|                   | R             | TTAGCCGGTGCTTTAGGCAG       |
| Lip132            | F             | AAGCATTACCGCTTGTGGTG       |
|                   | R             | GAACTCCCATTTTCAGCGATT      |
| IFN-g             | F             | GGCCATCCAGAGGAGCATAG       |
|                   | R             | TTTCTCCATGCTGCTGTTGAA      |
| IL-4              | F             | CCACGGAGAAAGACCTCATCTG     |
|                   | R             | GGGTCACCTCATGTTGGAAATAAA   |
